# Supplementary material for: Thermoelectric properties of the aliovalent half-Heusler alloy Zn0.5Ti0.5NiSb with intrinsic low thermal conductivity
Source: Royal Society of Chemistry journal article supplement (doi:10.1039/d3ta04514e), 2023-01-01
Supplement: d3ta04514e1.pdf [file d3ta04514e1.pdf]

Supplementary Information for:

**Thermoelectric properties of the aliovalent half-Heusler alloy  $\text{Zn}_{0.5}\text{Ti}_{0.5}\text{NiSb}$  with intrinsic low thermal conductivity**

Blair F. Kennedy<sup>1</sup>, Simon A. J. Kimber,<sup>2</sup> Stefano Checchia,<sup>3</sup> A. K. M. Ashiquzzaman Shawon,<sup>5</sup>  
Alexandra Zevalkink,<sup>5</sup> Emmanuelle Suard<sup>6</sup>, Jim Buckman<sup>7</sup> and Jan-Willem G. Bos<sup>4</sup>

*1. Institute of Chemical Sciences, School of Engineering and Physical Sciences, Heriot-Watt University, Edinburgh, EH14 4AS, UK.*

*2. Université Bourgogne Franche-Comté, Université de Bourgogne, Nanosciences Department, ICB-Laboratoire Interdisciplinaire Carnot de Bourgogne, Bâtiment Sciences Mirande, Dijon, France.*

*3. ESRF, The European Synchrotron, 71 Avenue des Martyrs, CS40220, 38043 Grenoble Cedex 9, France.*

*4. EaStCHEM School of Chemistry, University of St Andrews, North Haugh, St Andrews, KY16 9ST, UK.*

*5. Chemical Engineering and Materials Science Department, Michigan State University, East Lansing, Michigan 48824, USA.*

*6. Institut Laue-Langevin (ILL), BP 156, 71 Avenue des Martyrs, 38042 Grenoble, France*

*7. School of Energy, Geoscience, Infrastructure and Society, Heriot-Watt University, Edinburgh, EH14 4AS, UK.*

**Email:** [j.w.g.bos@st-andrews.ac.uk](mailto:j.w.g.bos@st-andrews.ac.uk)

**Table S1:** Half-Heusler compositions for hot-pressed  $\text{Zn}_{1-x}\text{Ti}_x\text{NiSb}$  disks derived from EDX elemental maps shown in Fig. S1.

| <b>Nominal Composition</b>                    | <b>EDX Composition</b>                               |
|-----------------------------------------------|------------------------------------------------------|
| $\text{Zn}_{0.35}\text{Ti}_{0.65}\text{NiSb}$ | $\text{Zn}_{0.32}\text{Ti}_{0.65}\text{NiSb}_{1.02}$ |
| $\text{Zn}_{0.40}\text{Ti}_{0.60}\text{NiSb}$ | $\text{Zn}_{0.39}\text{Ti}_{0.61}\text{NiSb}$        |
| $\text{Zn}_{0.45}\text{Ti}_{0.55}\text{NiSb}$ | $\text{Zn}_{0.42}\text{Ti}_{0.54}\text{NiSb}_{1.03}$ |
| $\text{Zn}_{0.50}\text{Ti}_{0.50}\text{NiSb}$ | $\text{Zn}_{0.47}\text{Ti}_{0.53}\text{NiSb}$        |
| $\text{Zn}_{0.55}\text{Ti}_{0.45}\text{NiSb}$ | $\text{Zn}_{0.55}\text{Ti}_{0.46}\text{NiSb}_{1.02}$ |
| $\text{Zn}_{0.60}\text{Ti}_{0.40}\text{NiSb}$ | $\text{Zn}_{0.58}\text{Ti}_{0.41}\text{NiSb}_{1.01}$ |

**Table S2:** Overview of resistivity fit parameters for the  $\text{Zn}_{1-x}\text{Ti}_x\text{NiSb}$  samples,<sup>1</sup> see manuscript for further details.

|                                               | $E_g$ (eV)   | $\rho_0$ ( $\mu\Omega\cdot\text{m}$ ) | $B(\times 10^{-4} \mu\Omega\cdot\text{m}\cdot\text{K}^{-1.5})$ | $A$ ( $\mu\Omega\cdot\text{m}$ ) | $\rho_0/B$ ( $\text{K}^{1.5}$ ) |
|-----------------------------------------------|--------------|---------------------------------------|----------------------------------------------------------------|----------------------------------|---------------------------------|
| <b>n-type</b>                                 |              |                                       |                                                                |                                  |                                 |
| $\text{Zn}_{0.35}\text{Ti}_{0.65}\text{NiSb}$ | 0.39 (fixed) | 7(1)                                  | 2.5(3)                                                         | 5.4(1)                           | 27500                           |
| $\text{Zn}_{0.40}\text{Ti}_{0.60}\text{NiSb}$ | 0.39 (fixed) | 14(1)                                 | 4.7(3)                                                         | 4.0(1)                           | 29978                           |
| $\text{Zn}_{0.45}\text{Ti}_{0.55}\text{NiSb}$ | 0.39(2)      | 33(3)                                 | -                                                              | 2.0(1)                           | -                               |
| <b>p-type</b>                                 |              |                                       |                                                                |                                  |                                 |
| $\text{Zn}_{0.50}\text{Ti}_{0.50}\text{NiSb}$ | 0.39(2)      | 53(3)                                 | -                                                              | 2.1(1)                           | -                               |
| $\text{Zn}_{0.55}\text{Ti}_{0.45}\text{NiSb}$ | 0.39 (fixed) | 15(1)                                 | -                                                              | 1.8(1)                           | -                               |
| $\text{Zn}_{0.60}\text{Ti}_{0.40}\text{NiSb}$ | 0.39 (fixed) | 7(1)                                  | 0.7(1)                                                         | 1.9(1)                           | 105980                          |

**Table S3:** Measured, crystallographic and % density of the hot pressed  $\text{Zn}_{1-x}\text{Ti}_x\text{NiSb}$  ( $0.4 \leq x \leq 0.65$ ) disks characterised in this manuscript.

| <b>Composition</b>                            | <b>Measured Density<br/>(<math>\text{g}\cdot\text{cm}^{-3}</math>)</b> | <b>Crystallographic Density<br/>(<math>\text{g}\cdot\text{cm}^{-3}</math>)</b> | <b>% Density</b> |
|-----------------------------------------------|------------------------------------------------------------------------|--------------------------------------------------------------------------------|------------------|
| $\text{Zn}_{0.35}\text{Ti}_{0.65}\text{NiSb}$ | 7.37(2)                                                                | 7.58                                                                           | 97.2             |
| $\text{Zn}_{0.40}\text{Ti}_{0.60}\text{NiSb}$ | 7.41(2)                                                                | 7.58                                                                           | 97.7             |
| $\text{Zn}_{0.45}\text{Ti}_{0.55}\text{NiSb}$ | 7.48(2)                                                                | 7.59                                                                           | 98.5             |
| $\text{Zn}_{0.50}\text{Ti}_{0.50}\text{NiSb}$ | 7.5(2)                                                                 | 7.60                                                                           | 98.7             |
| $\text{Zn}_{0.55}\text{Ti}_{0.45}\text{NiSb}$ | 7.51(2)                                                                | 7.60                                                                           | 98.8             |
| $\text{Zn}_{0.60}\text{Ti}_{0.40}\text{NiSb}$ | 7.56(2)                                                                | 7.61                                                                           | 99.3             |

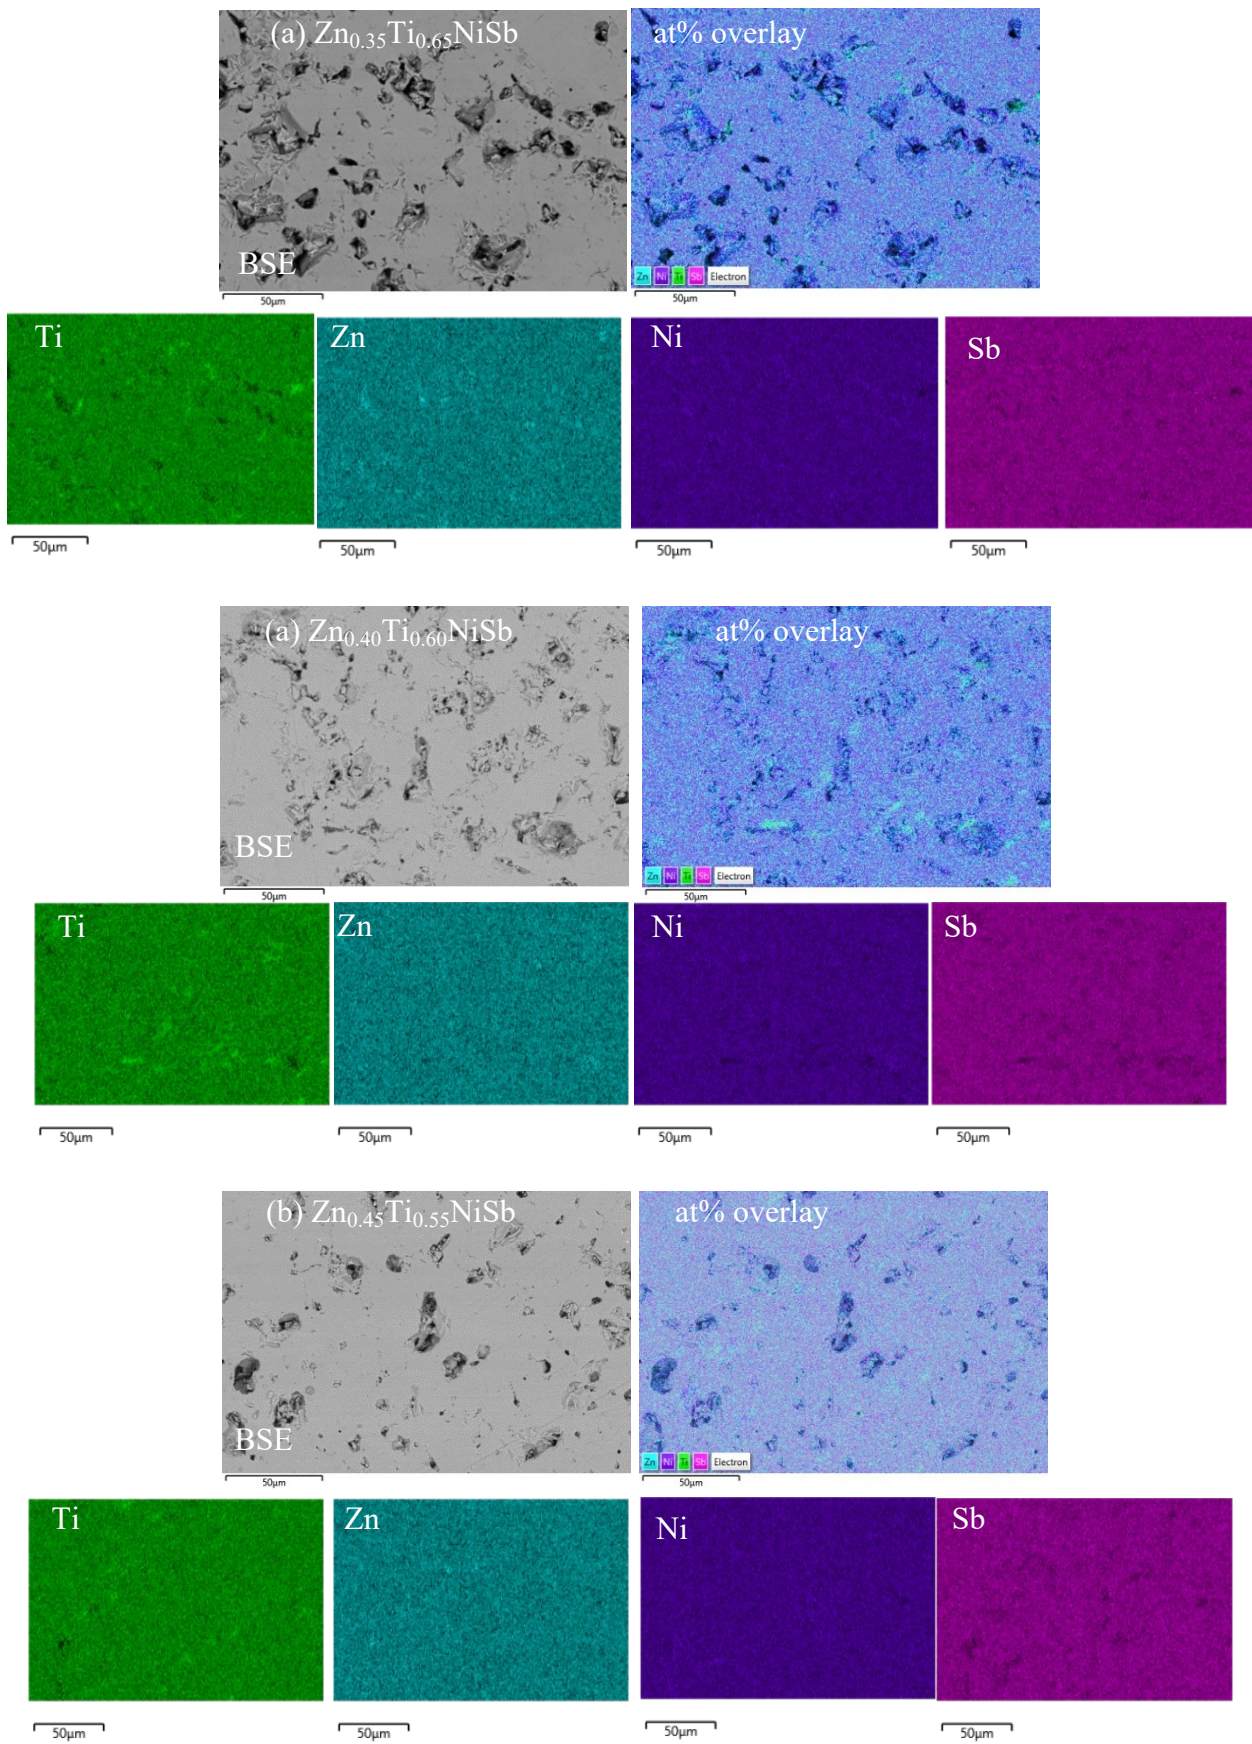

**Figure S1:** Backscattered Secondary Electron SEM images, at% composite and individual elemental at% maps for n-type Zn<sub>1-x</sub>Ti<sub>x</sub>NiSb disks.

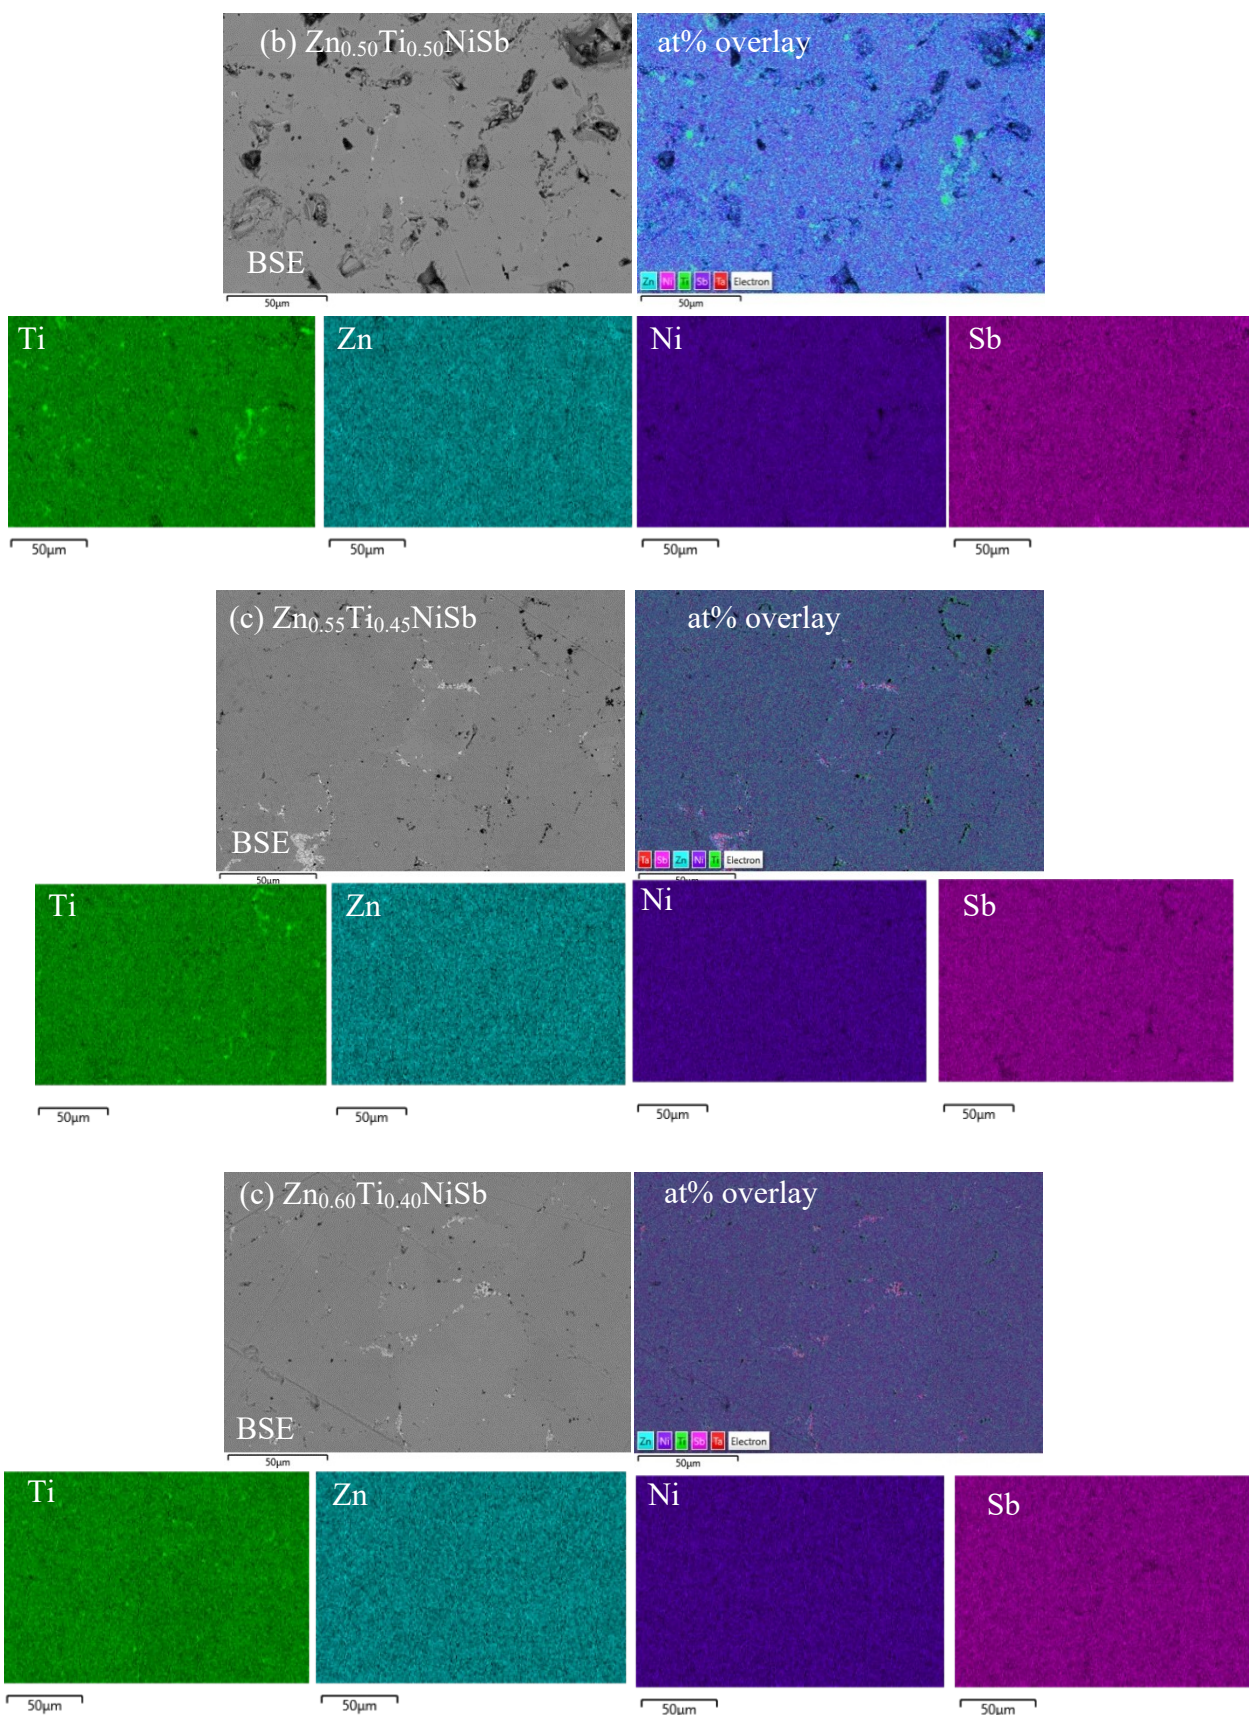

**Figure S2:** Backscattered Secondary Electron SEM images, at% composite and individual elemental at% maps for p-type  $Zn_{1-x}Ti_xNiSb$  disks.

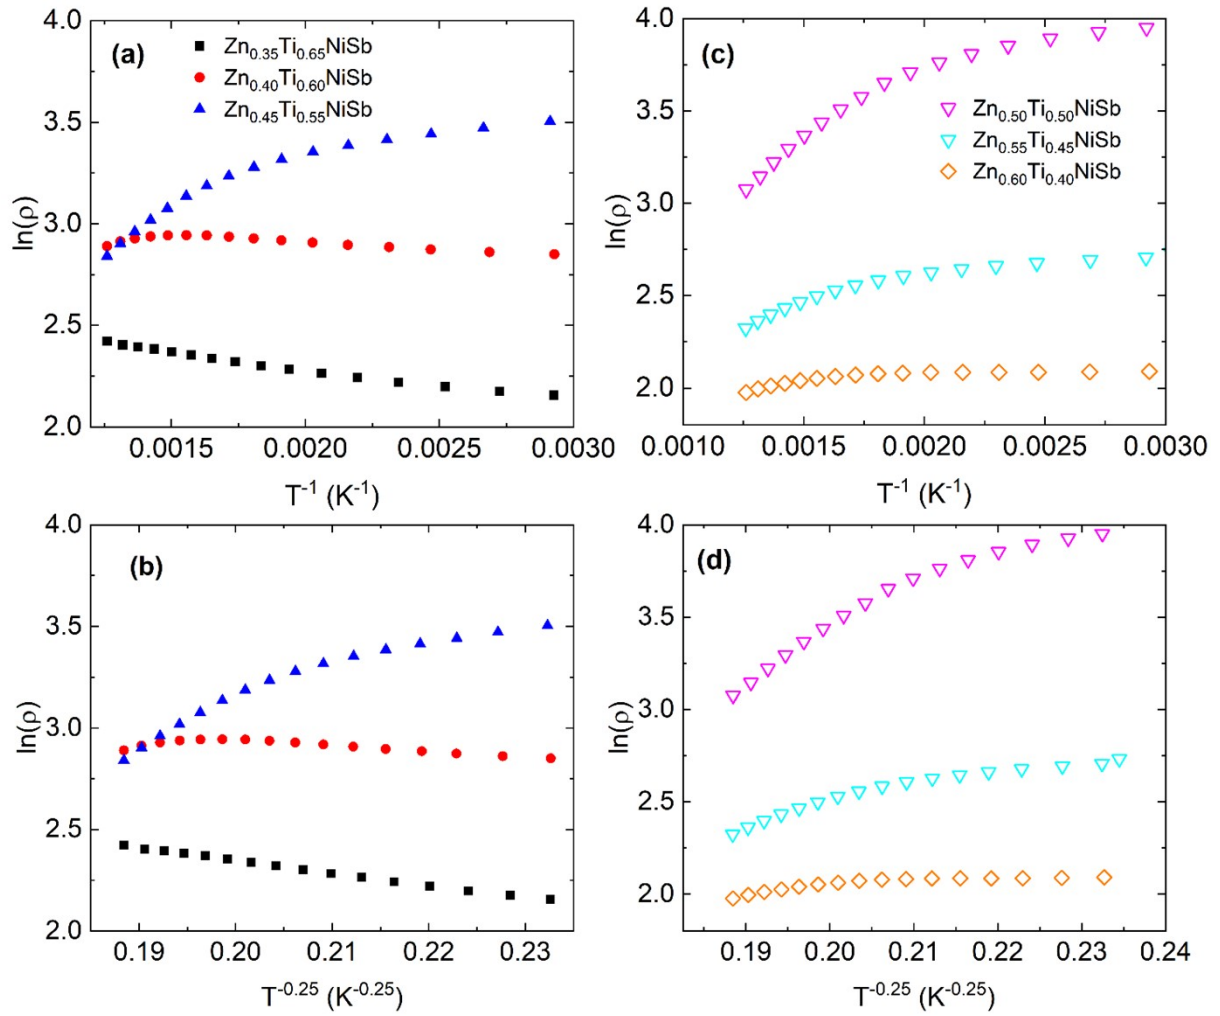

**Figure S3:** Temperature dependence of  $\ln[\rho(T)]$  plotted against  $T^{-1}$  and  $T^{-0.25}$  to check for pure thermally activated semiconducting and variable range hopping transport in **(a-b)** n-type and **(c-d)** p-type  $\text{Zn}_{1-x}\text{Ti}_x\text{NiSb}$ .

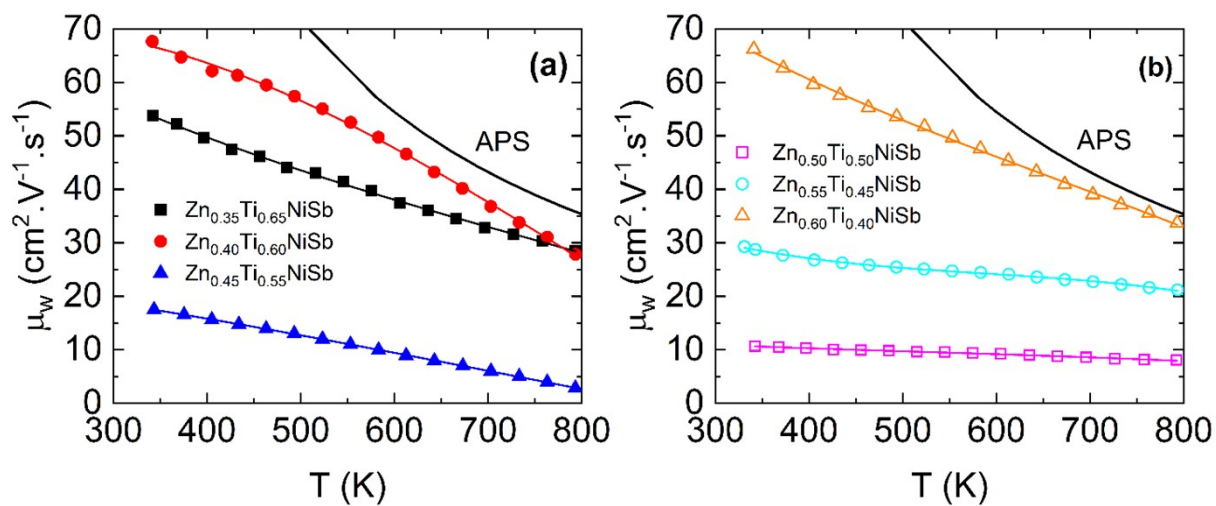

**Figure S4:** Temperature dependence of the weighted mobility ( $\mu_w$ ) calculated from  $S(T)$  and  $\rho(T)$  for (a) n-type and (b) p-type  $\text{Zn}_{1-x}\text{Ti}_x\text{NiSb}$ .<sup>2</sup>

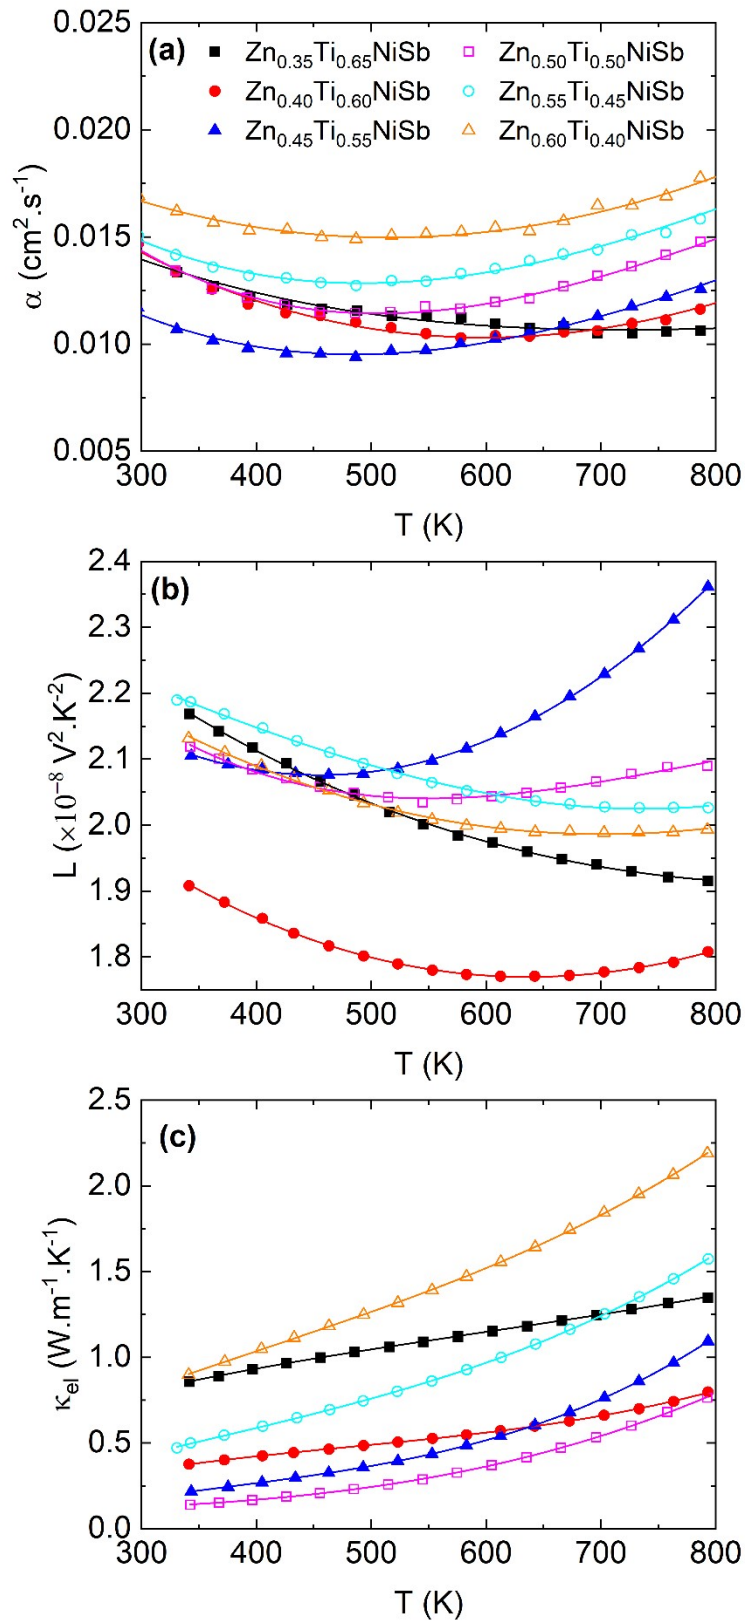

**Figure S5:** Temperature dependence of the (a) thermal diffusivity, (b) calculated Lorenz number,<sup>3</sup> and (c) electronic thermal conductivity ( $\kappa_{el} = LT/\rho$ ) for the Zn<sub>1-x</sub>Ti<sub>x</sub>NiSb samples.



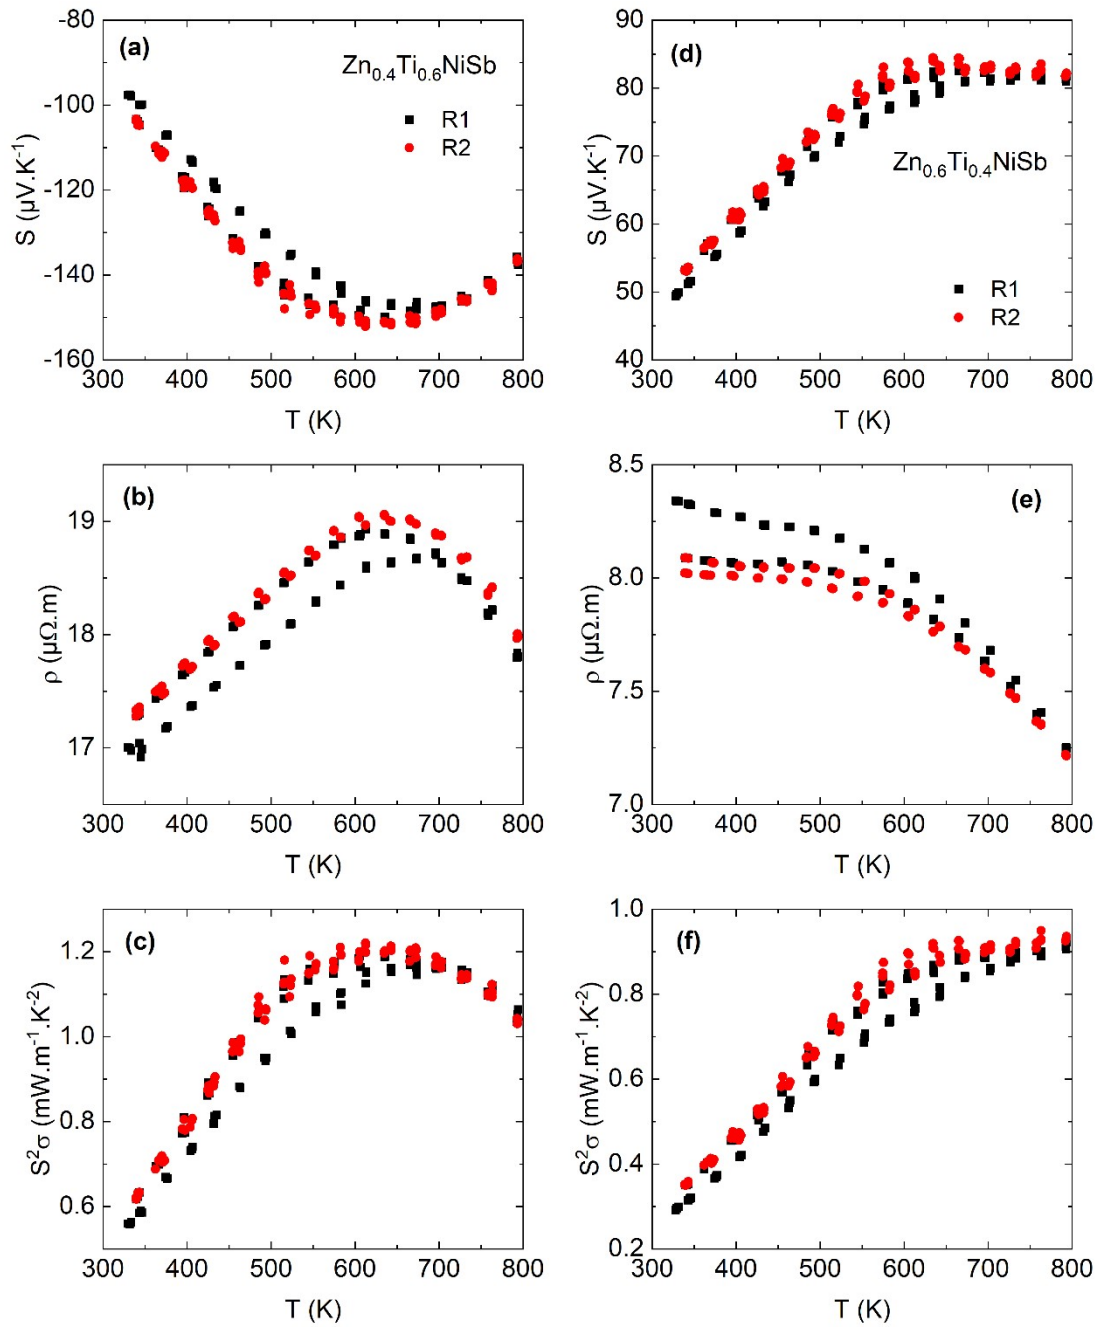

**Figure S6:** Thermal cycling for the best performing n-type  $Zn_{0.4}Ti_{0.6}NiSb$  (a-c) and p-type  $Zn_{0.6}Ti_{0.4}NiSb$  (d-f) samples. The first measurement on heating is slightly offset, but subsequent cooling-heating measurements fall on top of each other.

## References

1. R. J. Quinn, G. B. G. Stenning and J.-W. G. Bos, *Journal of Physics: Energy*, 2022, **4**, 024005.
2. G. J. Snyder, A. H. Snyder, M. Wood, R. Gurunathan, B. H. Snyder and C. Niu, *Advanced Materials*, 2020, **32**, 2001537.
3. H.-S. Kim, Z. M. Gibbs, Y. Tang, H. Wang and G. J. Snyder, *APL Materials*, 2015, **3**, 041506.
